# Supplementary material for: Hospital readmission among people experiencing homelessness in England: a cohort study of 2772 matched homeless and housed inpatients
Source: PubMed Central journal article supplement (PMC8223662; doi:10.1136/jech-2020-215204), 2021-01-05

## Supplementary Information

|   |                                                                                                  |   |
|---|--------------------------------------------------------------------------------------------------|---|
| 1 | Comparison of matched and unmatched homeless participants .....                                  | 2 |
| 2 | Full results of regression models comparing homeless and housed participants .....               | 3 |
| 3 | Cumulative incidence of readmission at 12 months, stratified by reason for index admission ..... | 5 |
| 4 | Algorithm for selecting index admission of homeless participants.....                            | 6 |

## 1 Comparison of matched and unmatched homeless participants

| Variable                       | Level           | Matched<br>n (%)    | Unmatched<br>n (%)  |
|--------------------------------|-----------------|---------------------|---------------------|
| Total                          |                 | 2,772 (100)         | 537 (100)           |
| Age                            | Mean (sd)       | 44.21 (14.15)       | 41.14 (11.85)       |
|                                | Median (IQR)    | 43.64 (33.37-53.75) | 40.92 (32.97-48.94) |
| Sex                            | Female          | 768 (28)            | 80 (15)             |
|                                | Male            | 2,004 (72)          | 457 (85)            |
| Year of index                  | 2013            | 76 (3)              | 30 (6)              |
|                                | 2014            | 769 (28)            | 130 (24)            |
|                                | 2015            | 948 (34)            | 155 (29)            |
|                                | 2016            | 979 (35)            | 222 (41)            |
| Comorbidities                  | 0               | 926 (33)            | 183 (34)            |
|                                | 1               | 769 (28)            | 170 (32)            |
|                                | 2               | 541 (20)            | 94 (18)             |
|                                | 3               | 307 (11)            | 53 (10)             |
|                                | 4+              | 229 (8)             | 37 (7)              |
|                                | Mean (sd)       | 1.38 (1.41)         | 1.28 (1.35)         |
|                                | Median (IQR)    | 1 (0-2)             | 1 (0-2)             |
| Reason for index admission     | External        | 695 (25)            | 131 (24)            |
|                                | Digestive       | 223 (8)             | 28 (5)              |
|                                | Circulatory     | 226 (8)             | 25 (5)              |
|                                | Mental health   | 347 (13)            | 156 (29)            |
|                                | Respiratory     | 189 (7)             | 19 (4)              |
|                                | Skin            | 206 (7)             | 29 (5)              |
|                                | Genitourinary   | 89 (3)              | 9 (2)               |
|                                | Musculoskeletal | 112 (4)             | 17 (3)              |
|                                | Infections      | 75 (3)              | 10 (2)              |
|                                | Cancers         | 63 (2)              | 6 (1)               |
|                                | Other           | 547 (20)            | 107 (20)            |
| Type of discharge <sup>a</sup> | Normal          | 2,519 (91)          | 487 (91)            |
|                                | DAMA            | 253 (9)             | 50 (9)              |

<sup>a</sup> Normal = With medical consent. DAMA = Discharge against medical advice.

## 2 Full results of regression models comparing homeless and housed participants

We used mixed negative binomial models with the count of readmissions as the dependent variable and the homeless or housed status of the patient as the main independent variable. Other independent variables are shown in the table below, plus an offset for the log follow-up time. In adjusted models, a random effect is included for the hospital site. The values in the table are Incident Rate Ratios with 95% confidence intervals.

| Variable                      | Level           | Unadjusted           | Adjusted for matching variables <sup>b</sup> | Fully adjusted    |
|-------------------------------|-----------------|----------------------|----------------------------------------------|-------------------|
| <b>Emergency readmissions</b> |                 |                      |                                              |                   |
| Group                         | Housed (ref)    | 1                    | 1                                            | 1                 |
|                               | Homeless        | 2.69 (2.46, 2.94)    | 2.92 (2.67, 3.19)                            | 2.49 (2.29, 2.70) |
| Sex                           | Female (ref)    | 1                    |                                              |                   |
|                               | Male            | 0.93 (0.84, 1.03)    |                                              |                   |
| Age                           |                 | 1.16 (1.10, 1.21)    |                                              |                   |
| Comorbidities                 | 0 (ref)         | 1                    | 1                                            |                   |
|                               | 1               | 2.76 (2.49, 3.06)    | 2.73 (2.46, 3.03)                            |                   |
|                               | 2               | 4.86 (4.32, 5.47)    | 4.78 (4.24, 5.38)                            |                   |
|                               | 3               | 6.37 (5.50, 7.38)    | 6.17 (5.32, 7.16)                            |                   |
|                               | 4+              | 12.65 (10.78, 14.86) | 12.37 (10.52, 14.56)                         |                   |
| Reason for index admission    | External (ref)  | 1                    | 1                                            |                   |
|                               | Cancers         | 1.72 (1.24, 2.38)    | 1.52 (1.09, 2.11)                            |                   |
|                               | Circulatory     | 1.02 (0.84, 1.24)    | 0.91 (0.75, 1.11)                            |                   |
|                               | Digestive       | 1.22 (1.02, 1.47)    | 1.17 (0.98, 1.41)                            |                   |
|                               | Genitourinary   | 1.08 (0.86, 1.35)    | 0.95 (0.76, 1.19)                            |                   |
|                               | Infections      | 1.05 (0.78, 1.41)    | 1.00 (0.75, 1.35)                            |                   |
|                               | Musculoskeletal | 1.18 (0.93, 1.51)    | 1.11 (0.87, 1.41)                            |                   |
|                               | Mental health   | 1.82 (1.51, 2.20)    | 1.75 (1.45, 2.11)                            |                   |
|                               | Other           | 1.19 (1.03, 1.36)    | 1.13 (0.98, 1.29)                            |                   |
|                               | Respiratory     | 1.67 (1.38, 2.03)    | 1.45 (1.19, 1.76)                            |                   |
|                               | Skin            | 1.02 (0.82, 1.27)    | 0.97 (0.78, 1.20)                            |                   |
| Year of index admission       | 2013 (ref)      | 1                    |                                              |                   |
|                               | 2014            | 0.76 (0.57, 1.01)    |                                              |                   |
|                               | 2015            | 0.62 (0.47, 0.82)    |                                              |                   |
|                               | 2016            | 0.76 (0.57, 1.00)    |                                              |                   |
| <b>Planned readmissions</b>   |                 |                      |                                              |                   |
| Group                         | Housed (ref)    | 1                    | 1                                            | 1                 |
|                               | Homeless        | 0.62 (0.54, 0.70)    | 0.63 (0.55, 0.72)                            | 0.60 (0.53, 0.68) |
| Sex                           | Female (ref)    | 1                    |                                              |                   |
|                               | Male            | 0.90 (0.78, 1.04)    |                                              |                   |
| Age                           |                 | 1.35 (1.26, 1.44)    |                                              |                   |
| Comorbidities                 | 0 (ref)         | 1                    | 1                                            |                   |
|                               | 1               | 1.93 (1.64, 2.26)    | 1.87 (1.60, 2.19)                            |                   |
|                               | 2               | 2.49 (2.06, 2.99)    | 2.37 (1.97, 2.85)                            |                   |
|                               | 3               | 3.62 (2.87, 4.55)    | 3.43 (2.72, 4.32)                            |                   |
|                               | 4+              | 8.65 (6.72, 11.12)   | 8.09 (6.29, 10.42)                           |                   |

<sup>b</sup> Homeless and housed groups were matched on age group, sex, year of discharge, and hospital site. Hospital site is included as a random effect. Age is standardised such that the coefficient represents the association with one standard deviation in age.

| Variable                   | Level             | Unadjusted           | Adjusted for matching variables <sup>b</sup> | Fully adjusted    |
|----------------------------|-------------------|----------------------|----------------------------------------------|-------------------|
| Reason for index admission | External (ref)    | 1                    | 1                                            |                   |
|                            | Cancers           | 15.41 (10.28, 23.12) | 15.21 (10.20, 22.69)                         |                   |
|                            | Circulatory       | 1.65 (1.26, 2.16)    | 1.26 (0.96, 1.66)                            |                   |
|                            | Digestive         | 2.12 (1.65, 2.74)    | 2.04 (1.58, 2.63)                            |                   |
|                            | Genitourinary     | 4.35 (3.23, 5.85)    | 3.50 (2.61, 4.71)                            |                   |
|                            | Infections        | 2.85 (1.92, 4.23)    | 2.96 (2.01, 4.36)                            |                   |
|                            | Musculoskeletal   | 1.76 (1.25, 2.46)    | 1.43 (1.02, 2.00)                            |                   |
|                            | Mental health     | 0.75 (0.57, 1.01)    | 0.74 (0.56, 0.99)                            |                   |
|                            | Other             | 1.97 (1.63, 2.39)    | 1.92 (1.58, 2.32)                            |                   |
|                            | Respiratory       | 3.24 (2.49, 4.23)    | 2.90 (2.23, 3.78)                            |                   |
| Skin                       | 1.97 (1.47, 2.66) | 1.80 (1.33, 2.42)    |                                              |                   |
| Year of index admission    | 2013 (ref)        | 1                    |                                              |                   |
|                            | 2014              | 0.79 (0.53, 1.19)    |                                              |                   |
|                            | 2015              | 0.95 (0.63, 1.42)    |                                              |                   |
|                            | 2016              | 1.11 (0.74, 1.66)    |                                              |                   |
| <b>A&amp;E visits</b>      |                   |                      |                                              |                   |
| Group                      | Housed (ref)      | 1                    | 1                                            | 1                 |
|                            | Homeless          | 3.02 (2.82, 3.22)    | 3.06 (2.86, 3.27)                            | 2.57 (2.41, 2.73) |
| Sex                        | Female (ref)      | 1                    |                                              |                   |
|                            | Male              | 1.01 (0.93, 1.09)    |                                              |                   |
| Age                        |                   | 0.99 (0.96, 1.03)    |                                              |                   |
| Comorbidities              | 0 (ref)           | 1                    | 1                                            |                   |
|                            | 1                 | 2.19 (2.03, 2.37)    | 2.24 (2.07, 2.43)                            |                   |
|                            | 2                 | 3.26 (2.97, 3.58)    | 3.32 (3.03, 3.65)                            |                   |
|                            | 3                 | 4.13 (3.67, 4.64)    | 4.39 (3.90, 4.94)                            |                   |
|                            | 4+                | 8.16 (7.16, 9.30)    | 8.65 (7.58, 9.86)                            |                   |
| Reason for index admission | External (ref)    | 1                    | 1                                            |                   |
|                            | Cancers           | 0.78 (0.61, 1.01)    | 0.77 (0.60, 0.99)                            |                   |
|                            | Circulatory       | 0.67 (0.58, 0.78)    | 0.67 (0.58, 0.78)                            |                   |
|                            | Digestive         | 1.06 (0.92, 1.21)    | 1.05 (0.91, 1.20)                            |                   |
|                            | Genitourinary     | 0.80 (0.67, 0.94)    | 0.76 (0.64, 0.90)                            |                   |
|                            | Infections        | 0.82 (0.66, 1.03)    | 0.83 (0.66, 1.03)                            |                   |
|                            | Musculoskeletal   | 1.19 (0.99, 1.43)    | 1.20 (1.00, 1.44)                            |                   |
|                            | Mental health     | 1.94 (1.68, 2.25)    | 1.92 (1.66, 2.22)                            |                   |
|                            | Other             | 1.04 (0.94, 1.16)    | 1.04 (0.94, 1.15)                            |                   |
|                            | Respiratory       | 1.36 (1.17, 1.57)    | 1.33 (1.15, 1.54)                            |                   |
| Skin                       | 0.92 (0.78, 1.08) | 0.91 (0.77, 1.07)    |                                              |                   |
| Year of index admission    | 2013 (ref)        | 1                    |                                              |                   |
|                            | 2014              | 0.65 (0.52, 0.80)    |                                              |                   |
|                            | 2015              | 0.59 (0.48, 0.73)    |                                              |                   |
|                            | 2016              | 0.68 (0.55, 0.85)    |                                              |                   |

### 3 Cumulative incidence of readmission at 12 months, stratified by reason for index admission

We used the Kaplan-Meier method to estimate the cumulative incidence of readmission during the first 12 months after discharge (i.e. the risk of one or more readmissions), with censoring at death or end-of-follow-up. The values in the table below are percentages with 95% confidence intervals.

| ICD-10 chapter of index admission | Homeless                | Housed                  |
|-----------------------------------|-------------------------|-------------------------|
| <b>Emergency readmissions</b>     |                         |                         |
| Cancers                           | 61.9 (49.0-74.9)        | 56.2 (45.3-67.7)        |
| Circulatory                       | 55.9 (47.3-64.8)        | 34.8 (30.6-39.2)        |
| Digestive                         | 67.3 (60.4-74.0)        | 30.9 (26.0-36.5)        |
| External & injuries               | 55.0 (51.4-58.8)        | 24.5 (20.2-29.7)        |
| Genitourinary                     | 67.5 (56.8-77.7)        | 31.6 (23.4-41.7)        |
| Infections                        | 57.2 (48.2-66.5)        | 33.8 (21.8-49.9)        |
| Mental & behavioural              | 66.9 (61.4-72.3)        | 43.1 (30.6-58.0)        |
| Musculoskeletal                   | 65.2 (57.0-73.4)        | 40.1 (33.3-47.8)        |
| Other                             | 60.8 (56.0-65.7)        | 32.8 (28.8-37.2)        |
| Respiratory                       | 65.1 (60.3-69.8)        | 37.0 (30.2-44.7)        |
| Skin                              | 65.2 (59.3-70.9)        | 34.9 (27.0-44.2)        |
| <b>ALL</b>                        | <b>61.3 (58.8-63.7)</b> | <b>33.1 (30.3-36.0)</b> |
| <b>Planned readmissions</b>       |                         |                         |
| Cancers                           | 49.7 (29.1-74.7)        | 68.8 (59.7-77.6)        |
| Circulatory                       | 19.7 (12.0-31.4)        | 29.5 (24.5-35.2)        |
| Digestive                         | 23.3 (16.9-31.6)        | 46.4 (40.6-52.6)        |
| External & injuries               | 13.7 (11.1-16.9)        | 20.1 (16.9-23.7)        |
| Genitourinary                     | 30.0 (18.2-46.8)        | 43.2 (36.3-50.9)        |
| Infections                        | 17.0 (11.3-25.1)        | 31.2 (23.0-41.3)        |
| Mental & behavioural              | 10.6 (8.6-13.0)         | 20.7 (13.6-30.9)        |
| Musculoskeletal                   | 19.0 (10.7-32.4)        | 27.7 (20.3-37.1)        |
| Other                             | 17.3 (13.7-21.7)        | 27.2 (24.2-30.4)        |
| Respiratory                       | 17.4 (10.9-27.2)        | 27.9 (21.5-35.7)        |
| Skin                              | 8.3 (5.3-12.8)          | 18.0 (11.7-27.0)        |
| <b>ALL</b>                        | <b>16.5 (14.1-19.3)</b> | <b>30.0 (28.0-32.2)</b> |
| <b>A&amp;E visits</b>             |                         |                         |
| Cancers                           | 85.4 (74.3-93.5)        | 79.2 (72.1-85.5)        |
| Circulatory                       | 91.5 (88.1-94.2)        | 82.0 (77.4-86.2)        |
| Digestive                         | 94.9 (91.5-97.2)        | 83.3 (77.4-88.5)        |
| External & injuries               | 93.9 (92.4-95.2)        | 83.1 (77.8-87.8)        |
| Genitourinary                     | 90.8 (79.1-97.4)        | 82.4 (79.1-85.5)        |
| Infections                        | 87.9 (77.2-95.1)        | 82.4 (72.7-90.2)        |
| Mental & behavioural              | 95.4 (92.3-97.6)        | 84.9 (76.9-91.3)        |
| Musculoskeletal                   | 95.5 (91.5-97.9)        | 79.6 (69.7-88.0)        |
| Other                             | 94.2 (92.5-95.6)        | 84.3 (80.9-87.4)        |
| Respiratory                       | 96.7 (94.6-98.1)        | 88.1 (84.5-91.2)        |
| Skin                              | 93.7 (89.4-96.7)        | 83.5 (78.2-88.1)        |
| <b>ALL</b>                        | <b>93.8 (92.7-94.8)</b> | <b>83.6 (81.2-85.8)</b> |

## 4 Algorithm for selecting index admission of homeless participants

Admission dates supplied by Homeless Hospital Discharge schemes did not always exactly match dates recorded in the national Hospital Episode Statistics database. In some cases homeless patients were seen by a Homeless Hospital Discharge scheme more than once. We used the following algorithm to select an index date.

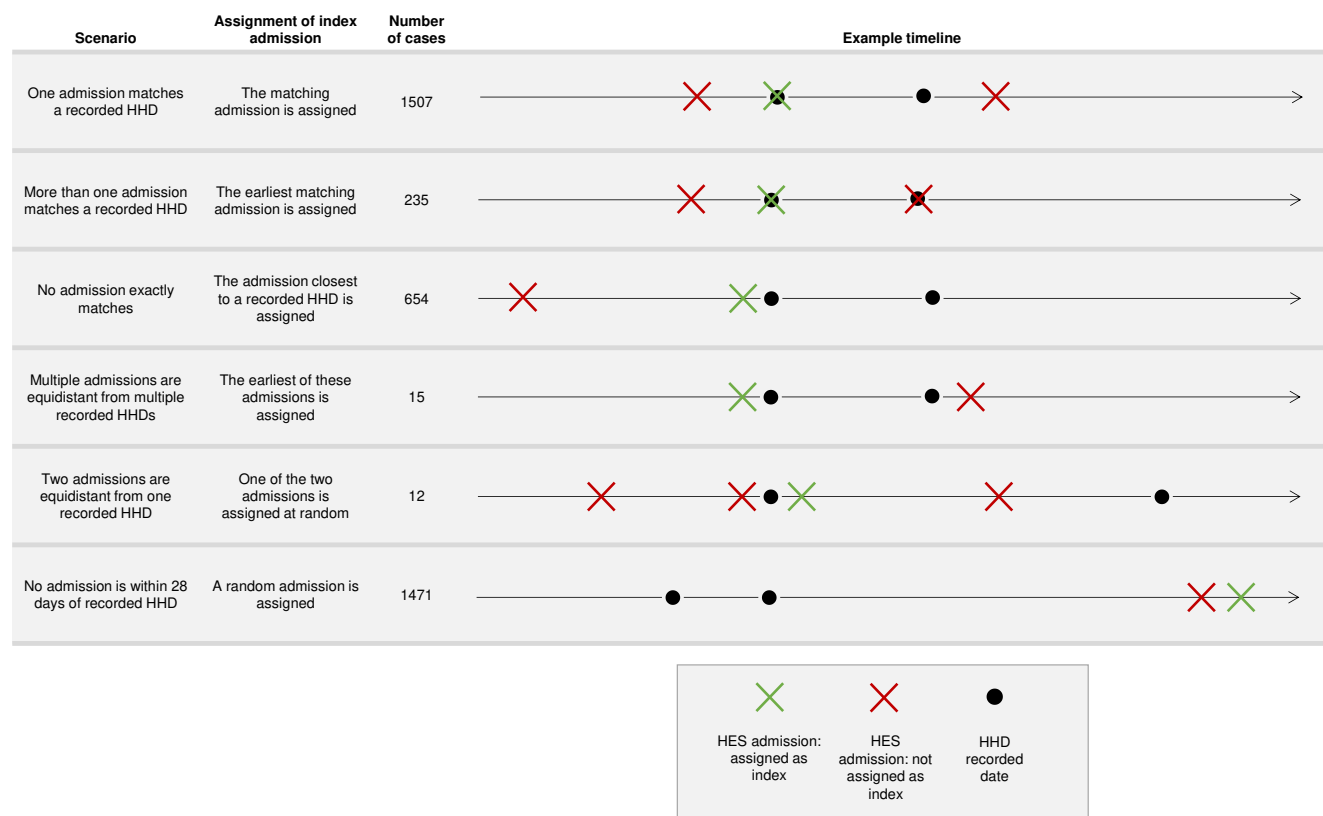

Supplement: jech-2020-215204supp001.pdf [file jech-2020-215204supp001.pdf]
